# Supplementary material
Source: HighWire-hosted journal article supplement (https://cmaj.ca/content/suppl/2017/03/21/189.12.E452)
Supplement: 160850-res-1-at.pdf [file 160850-res-1-at.pdf]

## **Appendix 1 (as supplied by the authors): ICD-10-CM External Cause of Firearm Injury Codes**

### Unintentional Firearm Injury

W32: Handgun discharge (firearm only)

W33: Rifle, shotgun and larger firearm discharge (firearm only)

W34: Discharge from other and unspecified firearms (includes airguns, BB guns and flare guns)

Y35.0 - Legal intervention involving firearm discharge

### Assault from firearm

X93: Assault by handgun discharge (firearm only)

X94: Assault by rifle, shotgun & larger firearm discharge (firearm only)

X95: Assault by other & unspecified firearm discharge (includes airguns, BB guns and flare guns)

U01.4: Terrorism involving firearms (homicide, completed or attempted).

### Firearm injuries not included in current study:

X72: Intentional self-harm by handgun discharge (firearm only)

X73: Intentional self-harm by rifle, shotgun & larger firearm discharge (firearm only)

X74: Intentional self-harm by other & unspecified firearm discharge (includes airguns, BB guns and flare guns)

Y22: Handgun discharge undetermined intent (firearm only)

Y23: Rifle shotgun & larger firearm discharge undetermined intent (firearm only)

Y24: Other & unspecified firearm discharge undetermined intent (includes airguns, BB guns and flare guns)
